# Supplementary material for: Volatile Composition and Sensory Profile of Lactose-Free Kefir, and Its Acceptability by Elderly Consumers
Source: MDPI journal article supplement (doi:10.3390/molecules27175386), 2022-08-24
Supplement: s1 [file s1]

## **Supplementary Materials**

### **Volatile composition and sensory profile of lactose-free kefir, and its acceptability by elderly consumers**

Jaroslawa Rutkowska<sup>1,\*</sup>, Agata Antoniewska-Krzeska<sup>1</sup>, Anna Żbikowska<sup>2</sup>, Patricia Cazón<sup>3</sup>, Manuel Vázquez<sup>3</sup>

<sup>1</sup>Institute of Human Nutrition Sciences, Faculty of Human Nutrition, Warsaw University of Life Sciences, Nowoursynowska st.159c, 02-776 Warsaw, Poland;

<sup>2</sup>Institute of Food Sciences, Department of Food Technology and Assessment, Division of Fat and Oils and Food Concentrates Technology, Warsaw University of Life Sciences (WULS-SGGW), Nowoursynowska st.159c, 02-776 Warsaw, Poland

<sup>3</sup>Department of Analytical Chemistry, Faculty of Veterinary, University of Santiago de Compostela, 27002-Lugo, Spain

\*Correspondence: jaroslawa\_rutkowska@sggw.edu.pl

**Table S1.** Microbial count of kefir samples on the 1st day of storage.

| Microbial enumeration, log CFU/ml |                   |                   |
|-----------------------------------|-------------------|-------------------|
| <i>Lactobacillus</i> spp.         | $7.67 \pm 0.18^a$ | $7.81 \pm 0.10^a$ |
| <i>Lactococcus</i> spp.           | $7.89 \pm 0.09^b$ | $7.66 \pm 0.07^a$ |
| <i>Leuconostoc</i> spp.           | $5.25 \pm 0.11^a$ | $5.45 \pm 0.14^a$ |
| LAB                               | $7.68 \pm 0.22^a$ | $7.93 \pm 0.25^b$ |
| Yeast                             | $2.95 \pm 0.10^a$ | $3.66 \pm 0.12^b$ |

LAB - Lactic acid bacteria; CFU - Colony-forming unit

The same letters in rows indicate the lack of a significant difference at  $p < 0.05$ .

Table S2. Definition/explanation of the sensory attributes used in kefir sensory analysis [16,27,52,63].

| Attribute        | Definition                                                                                                                                |
|------------------|-------------------------------------------------------------------------------------------------------------------------------------------|
| <b>Aroma</b>     |                                                                                                                                           |
| Fermented        | Aroma associated with curdled milk                                                                                                        |
| Creamy           | Aroma associated with full-fat cream                                                                                                      |
| Sour             | Aroma associated with organic acids                                                                                                       |
| Yeasty           | Aroma associated with fermented bread dough                                                                                               |
| Sweet            | Aroma associated with condensed sweetened milk                                                                                            |
| Fruity           | Aroma associated with apples, peaches and other fruits                                                                                    |
| <b>Taste</b>     |                                                                                                                                           |
| Sour             | Basic taste quality, typical for organic acids                                                                                            |
| Milky            | Taste typical of buttermilk                                                                                                               |
| Sweet            | Taste stimulated by sweeteners, such as sucrose                                                                                           |
| Bitter           | Taste sensation associated with caffeine                                                                                                  |
| Refreshing       | First cooling moment/cool and fresh effect                                                                                                |
| <b>Mouthfeel</b> |                                                                                                                                           |
| Mouthcoat        | The degree of coating on the tongue and palate during consumption                                                                         |
| Airy             | The sensation of associated with whipped cream                                                                                            |
| Astringent       | The puckering sensations on the tongue and other mouth surfaces.<br>A tingling feeling on the tongue similar to carbonated mineral water. |

**Table S3.** Absolute values of the peak area for the volatile compounds identified in kefir samples (means  $\pm$  SD, n = 5)

| Compounds                         | Rt    | Lactose-free kefir | Traditional kefir |
|-----------------------------------|-------|--------------------|-------------------|
| <b><i>Alcohols</i></b>            |       |                    |                   |
| Ethanol                           | 1.67  | 1.37 $\pm$ 0.09    | 1.77 $\pm$ 0.13*  |
| Ethanethiol                       | 1.85  | 1.65 $\pm$ 0.33    | 1.91 $\pm$ 0.20*  |
| 1-Pentanol                        | 4.30  | 0.40 $\pm$ 0.18    | 1.36 $\pm$ 0.03*  |
| 3-Methyl-1-butanol                | 4.41  | nd                 | 0.94 $\pm$ 0.01   |
| 2,3-Butanediol                    | 6.27  | 0.97 $\pm$ 0.32    | 4.79 $\pm$ 0.48*  |
| 2-Pentanol                        | 7.07  | nd                 | 0.28 $\pm$ 0.04   |
| 1-Hexanol                         | 11.39 | nd                 | 0.20 $\pm$ 0.00   |
| 2-Heptanol                        | 13.47 | 0.55 $\pm$ 0.00    | 0.22 $\pm$ 0.01*  |
| <i>Total</i>                      |       | 4.94 $\pm$ 0.14    | 11.47 $\pm$ 0.16* |
| <b><i>Acids</i></b>               |       |                    |                   |
| Acetic acid                       | 2.58  | 22.48 $\pm$ 1.16   | 34.89 $\pm$ 1.20* |
| Butanoic acid                     | 6.78  | 1.14 $\pm$ 0.22    | 1.02 $\pm$ 0.37   |
| Hexanoic acid                     | 19.37 | 3.21 $\pm$ 0.37    | 3.30 $\pm$ 0.19   |
| Octanoic acid                     | 26.86 | 0.43 $\pm$ 0.04    | 0.42 $\pm$ 0.05   |
| <i>Total</i>                      |       | 27.26 $\pm$ 0.49   | 39.63 $\pm$ 0.52* |
| <b><i>Aldehydes</i></b>           |       |                    |                   |
| Acetaldehyde                      | 1.49  | 0.42 $\pm$ 0.04    | 0.18 $\pm$ 0.02*  |
| 3-Methylbutanal                   | 2.81  | 0.98 $\pm$ 0.11    | 2.09 $\pm$ 0.08*  |
| Benzaldehyde                      | 16.80 | 0.07 $\pm$ 0.03    | 0.02 $\pm$ 0.02*  |
| Nonanal                           | 23.86 | 0.35 $\pm$ 0.01    | 0.10 $\pm$ 0.02*  |
| <i>Total</i>                      |       | 1.82 $\pm$ 0.04    | 2.39 $\pm$ 0.03*  |
| <b><i>Ketones</i></b>             |       |                    |                   |
| 2-Propanone                       | 1.77  | 3.91 $\pm$ 0.38    | 7.22 $\pm$ 0.47*  |
| 2,3-Butanedione                   | 2.19  | 6.34 $\pm$ 0.83    | 1.80 $\pm$ 0.20*  |
| 2-Butanone                        | 2.25  | 6.70 $\pm$ 0.02    | 8.81 $\pm$ 0.56*  |
| 3-Hydroxy-2-butanone              | 3.73  | 35.32 $\pm$ 2.10   | 5.60 $\pm$ 0.38*  |
| 2-Heptanone                       | 12.74 | 0.62 $\pm$ 0.16    | 0.63 $\pm$ 0.06   |
| 2-Nonanone                        | 23.35 | 0.86 $\pm$ 0.00    | 0.29 $\pm$ 0.01*  |
| <i>Total</i>                      |       | 53.75 $\pm$ 0.80   | 24.35 $\pm$ 0.22* |
| <b><i>Terpenes</i></b>            |       |                    |                   |
| $\alpha$ -Pinene                  | 15.14 | 0.16 $\pm$ 0.01    | 0.28 $\pm$ 0.16*  |
| $\beta$ -Pinene                   | 17.54 | 0.26 $\pm$ 0.01    | 0.32 $\pm$ 0.18   |
| 3-Carene                          | 19.37 | 0.20 $\pm$ 0.02    | 0.26 $\pm$ 0.16   |
| <i>m</i> -Cymene                  | 20.10 | 0.07 $\pm$ 0.02    | 0.12 $\pm$ 0.06*  |
| D-Limonene                        | 20.30 | 0.30 $\pm$ 0.00    | 0.42 $\pm$ 0.37*  |
| Copaene                           | 33.81 | 0.06 $\pm$ 0.01    | 0.10 $\pm$ 0.02   |
| <i>Total</i>                      |       | 1.05 $\pm$ 0.01    | 1.50 $\pm$ 0.12*  |
| <b><i>Other compounds</i></b>     |       |                    |                   |
| Toluene                           | 5.23  | 0.10 $\pm$ 0.03    | 0.13 $\pm$ 0.01   |
| Dimethyl disulfide                | 4.54  | 0.82 $\pm$ 0.33    | 0.66 $\pm$ 0.17*  |
| 2-Methyltetrahydro-thiophen-3-one | 18.21 | 0.22 $\pm$ 0.07    | 0.45 $\pm$ 0.22*  |
| <i>Total</i>                      |       | 1.14 $\pm$ 0.16    | 1.24 $\pm$ 0.40   |
| NI                                |       | 10.04 $\pm$ 0.18   | 19.42 $\pm$ 1.44  |

\* Significantly ( $p < 0.05$ ) different from the lactose-free kefir; NI – not identified nd - not detected; Rt - retention time
